# Supplementary material
Source: PubMed Central journal article supplement (PMC2258863)
Supplement: jbacter_190_6_2075__1.pdf [file jbacter_190_6_2075__1.pdf]

# Fig. S1-1

*Bam*HI -35 -10  
GGATCCGTTCCCTTTCAGAGTTTGGTGAAATCAAGTTTAAAAATATGTTTGGTGGTTTAGTAAAAACAGTAAATATTTAGAAAGTGATAGTACCAGTTGCATAT 100

S.D. ORF1 →  
CACTTCTAAAAAATAATAGAAAAGAGGTTTTTAAATGATTAATAATGTGACTTTAGTAGGAAGACTTACAAAAGACTGTGATTTGCGTTATACGTCAAAA 200  
M I N N V T L V G R L T K D C D L R Y T S N 22

TGGTGTAGCTGTGCGGCTTTTACACTAGCAGTTAACCGGAATTTTACGAATCAAATGGCGAACGTGAAGCAGACTATATTCAGTGTGTGATTTGGCGT 300  
G V A V A A F T L A V N R N F T N Q N G E R E A D Y I Q C V I W R 55

AAACCTGCAGAAACTTTAGCAAACATAACGAAAAGGAACATTGATTGGTCTTGTGGGTAGACTTCAAACACGTAACATGAGAATCAACAAGGACAAC 400  
K P A E T L A N Y T R K G T L I G L V G R L Q T R N Y E N Q Q G Q 88

GTATTTATGTGACAGAAGTGGTGTAGAAAAGCTTCCAATTGTTAGAGTCAAAGAAGTTAGTCAACAACGTGGTGTAAACGCTTCTAATCCTACACCAGT 500  
R I Y V T E V V V E S F Q L L E S K E V S Q Q R G V N A S N P T P V 122

TGGGCAGCAGGAAAAGCAATACGCAACAACCCCTTCCAGATTTAGAAGGTAGTCTATTGAGATTTAGATCATGACTTACCGTTTTAAGGAGGAGTGACT 600  
G Q Q E S N T Q Q P F P D L E G S S I E I S D H D L P F \* S.D. 150

ORF2 →  
CATGGTTAATGGAGATTTACAAAAATATATGCAGACAAGTACAAAGAACCGTACAGAACAACAACAATGGGAACGAGCTGTTGAAGGATTAACGTTT 700  
M V N G D L Q K I Y A D S T K K R T E Q Q T K W E R A V E G L T F 33

S.D. ORF3 →  
GATAGTTAGAAAAAAGAAAATTGAGTATCTTTAAAACGGAAAAAAGTTAGGGAGTTAGGAAATGAAACTATTTATTGGAAAAAAGTGGCTGCTGTT 800  
D R L E K K K I E Y S L K R K K S \* M K L F I G K K W L L L 50/12

AGCAGTAGCCACTTTGCTATTATCAGGATGCGCAAGTCTTGAACAAAAAGCACAAGATATTTGCAATGATGGTACTGGTAATTTTACTCAAACATTTTCG 900  
A V A T L L L S G C A S L E Q K A Q D I S N D G T G N F T Q T I S 45

AACGATAATCGTATACCAGCTGAATTTGTCCGTCATGTTGATGGAGATACCACCGTGTAAAGAATAGACGGAAAAGAACAAGGTTTCGCTTTTTATTAG 1000  
N D N R I P A E F V R H V D G D T T V L R I D G K E Q K V R F L L 78

TAGATACACCCGAGACTGTAAAGCCGAAAACAAAAGTACAGCCATTTGGTTTGGAACTAGTAAACGTACAAAAGAACTTTTGTCTACTGCTTCAGAAAT 1100  
V D T P E T V K P K T K V Q P F G L E A S K R T K E L L S T A S E I 112

TACTTTTGAATACGATAAGGGCGATAGAAGTATGCGCTATGGCCGTACATTGGGTATATATTTGTGGATGGGATGCTACTTCAGGAAACACTCGTGAGA 1200  
T F E Y D K G D R T D R Y G R T L G Y I F V D G M L L Q E T L V R 145

GAGGGATTAGCACGTGTGGCATATGTCAAAGAGCCCTAACACAAAGTATCTACTCGAATTAGAGGAAGCACAAGAAAAGGCTAAAAATGAGTCACTCGGAA 1300  
E G L A R V A Y V K E P N T K Y L L E L E E A Q E K A K N E S L G 178

S.D. ORF4 →  
TCTGGAGCATAACCAGGATACGTAAGTAAAGAGGGTATAAATAAGAAGATGAACGAGCAAATAAGTTTGTGTTGATTCAGACAATGATAACGATATCAA 1400  
I W S I P G Y V T E R G Y K \* M N E Q I S L F D S D N D K R Y Q 192/17

TTTTATGGACACTATTGTAATGACGATTGGTCTACTAAAACAGCAATGGTGAATGGTGTCTTGATATAGTGATAAGTTTGTAGCATTGAACTTTCCAAAG 1500  
F Y G H Y C N D D W S T K T A M V N G V S D I V I S F S I E L S K 50

ATGAACTGAAAAAATATGCAGAGATGCAATCAAATAGTCAGGTTTAAAGTATGGATACGCCATTAAGTTCTTTAAAAAATAATGTAAAGAAAGAATTGTT 1600  
D E L K K I C R D A I K I V R F K Y G Y A I K F F K N N V K K E L F 84

TATCAGGTTTGTAACTACACAACGAGCAAAAAACGAGATGTCTTTGAACATATAAATTTATATTTTAAATGGAAAGTGAAGAAAGATGAATGAGC 1700  
I R F D N Y T T S K K R D V F E H I N L Y F \* Tn5-8, 186 106

BglII  
GTAAAACACATGAATTAAGATCTTGCAGAAATATTTTACAGTCTCGTTTCAGGTATTAAGAGTAAATCAACTAATACATTATTAATGGAGGGAATA 1800

S.D. ORF5 →  
CTATTTAACAAAAAGGATGGATCAGAATGGCTATAAGAAAAGGTAATAAGCGTGCACAATCTAATTTAAATTTAAACAACAAGAAGGGTTAAAGTATCT 1900  
M A I R K G N K R A Q S N L N L K Q Q E G L K Y L 25

Tn5-161  
CAAAAACAAAATATAGAAAAAGCGAATCGAAAATCTTGCTATGGTCTCGAAATGTTACTAGAACAAGAACAAGCAGGTTTGTTAATTCCAAAACCTTAT 2000  
K T K Y R K S E S K I L A I G L E M L L E Q E Q A G L L I P K L Y 58

AAAAGGTGATTACTAAATACGTCACCTTTTTTATTTTCGTAAAAAAGTGACGTAACCTTTTTGATATCGTTTTCTTTTAACTGTCCGAAAGCATAGAAA 2100  
K R \* 60

# Fig. S1-2

|                                                                     |                                                             |                                  |      |
|---------------------------------------------------------------------|-------------------------------------------------------------|----------------------------------|------|
| -35                                                                 | -10                                                         | S.D.                             |      |
| TGTTTGGCAAATGTATAACTAAGT                                            | <u>GATAATATTTTATTGAAATGATATTTAGAGTTGTAATAGATACA</u>         | ACTTAATATTTTGGGGAAAATAAACTAAGGTA | 2200 |
| S.D. ORF6 →                                                         |                                                             |                                  |      |
| AGAATGGAGATAAAAATGAAATTTATAATGTTATGTGTACTTGT                        | TTTTAGTTTTTTCGGGTTGTTCTAACACAGAAAAATAAAGAAAATCCGCCAATAA     |                                  | 2300 |
| M E N K (M) K F I M L C V L V L V F S G C S N T E K N K E N P P I   |                                                             |                                  | 32   |
| AAGAAAGTACTAGTTCGTTATATAAAAACAAATCAAGTAAACGAATACA                   | ACTGAAACGAATAGTAGCACTGTAAATAAAAAAGAGGATAAAAGCTCGAT          |                                  | 2400 |
| K E S T S S L Y K T N S S K T N T T E T N S S T V N K K E D K S S I |                                                             |                                  | 66   |
| AAGTGAATCGTCAAAGAAAGCTAGTGAAGAACAAACAGTTACA                         | ACTTCAAAAAATGAAAGTACGAATGAATTACCAAATACTGTGCAATCAGGAAATCAA   |                                  | 2500 |
| S E S S K K A S E E Q T V T T S K N E S T N E L P N T V Q S G N Q   |                                                             |                                  | 99   |
| TCTGTGGATGCGCCATATGCTGTATCATTACAACAAATAGCAGA                        | ACTAAAAACGTTTGACCAACCCTATATGAGTGGCTCATTGCTGTAGATTTGAGGT     |                                  | 2600 |
| S V D A P Y A V S L Q Q I A E L K T F D Q P Y M S G S F A V D L R   |                                                             |                                  | 132  |
|                                                                     | Tn5-24                                                      |                                  |      |
| TAGATAATGCTAATGACACTAAAGGCGTGCTTACTTTTTCACTC                        | ACGCTCTCGTAAAGAACCTGAAAAATAGAACTAGAGAATCTTCATTTGTTGTAAA     |                                  | 2700 |
| L D N A N D T K G V L T F H S R S R K E P E K I E T R E S S F V V N |                                                             |                                  | 166  |
| TACAGTACCAACAAAAGAAATCAGAGTATTTTCCAATAATAAG                         | ATTGGTTTCAGGAATAAGAAGTGTAAAAGTGAATACAGAAATTATATGTGATAACCAA  |                                  | 2800 |
| T V P T K E I R V F S N N K I G S G I R T V K V N T E I I C D N Q   |                                                             |                                  | 199  |
| B9P2842F 5'-ccggaatTCTAGCAACCGAAAACCACGTTGG-3'                      |                                                             |                                  |      |
| GAGAAAATGTATTTATTTAAAAATAAAGAAGGGTCTATATCT                          | CTAGCAACCGAAAACCACGTTGGAAAATGTTTCAGAAGATCAATTAGATGTTATGATGG |                                  | 2900 |
| E K M Y L F K N K E G S I S L A T E N H V G N V S E D Q L D V M M   |                                                             |                                  | 232  |
|                                                                     | -35                                                         | -10                              |      |
| AGAATTTGCAAAATAACTAACATATCATTATCAAATAATTTACT                        | AAAAGTAGAAAATTAATAATTTTCTACTTTTTTTTTGT                      | CACAAAAAGATTATTC                 | 3000 |
| E N L Q N N *                                                       |                                                             |                                  | 238  |
|                                                                     | S.D.                                                        | ORF7 (bacL1) →                   |      |
| ACCACATATATTGGCGTATACGAAAAAGTCGCGACAAAAAAT                          | TATGAGGTGAAGTTTATGAATTACAGTCAAAAAGCAATCGAT                  | CTTTGTAAAAAGTACT                 | 3100 |
|                                                                     | M N Y S Q K A I D L C K K Y                                 |                                  | 14   |
| CAAACTTTTTCATTAAGCTGTAGCAGGAAGAAATGGAATTT                           | TATCTATTGGCTATGGTCACTTTACAAATGAAAAACATCCGAT                 | TAAACCAGGAATGGT                  | 3200 |
| S N F S L K A V A G R N G I L S I G Y G H F T N E K H P I K P G M V |                                                             |                                  | 48   |
|                                                                     | Tn5-42                                                      |                                  |      |
| CATTACAGAGAGCCAGGCTACTCAGATATTACGTGATGATCT                          | AAATGAACATGCAGCATTAAATCTAAACTTTTAGCAATTAAGCTACTCAGAATCAA    |                                  | 3300 |
| I T E S Q A T Q I L R D D L N E H A A L I S K L L A I K A T Q N Q   |                                                             |                                  | 81   |
| TTTGATGCATTAGTTTCTTCTCATTCTAAAGGATTAGGCT                            | TTTTACCAAGTTCAGATATCATGCATTTTACGAATAACAAAG                  | AATTTAATTCGGCTG                  | 3400 |
| F D A L V S F S H S K G L G F L P S S D I M H F T N N K E F N S A   |                                                             |                                  | 114  |
| CAAGAGAAATGAAATTTGTATGCTATGATATTGGAAGCAT                            | TAAATTACCAAACTTGTGTAACGAAACGCTGAAACAGCCCT                   | TTATCTTGAAGGTGC                  | 3500 |
| A R E M K L Y V Y D I G S I K L P K L V E R R N A E T A L Y L E G A |                                                             |                                  | 148  |
| CTCTGGTAATGAGGAAACAACAAATCACGCACGTATTGGT                            | TTTGATGTAATGATTCGTTGGATGGAACAAAAAAGCTCAACATATA              | ACTTATAGTATG                     | 3600 |
| S G N E E T T N H A R I G F D V M I R W M E Q K K A Q H I T Y S M   |                                                             |                                  | 181  |
| GATTACCGATTAGGACCAAATCTTATGATTGTTCAAGT                              | GCTGTGATTTTGCATTAAAGAGGCAGGGTTTATGATCCTTCAACT               | TTTTCCTGGAAATA                   | 3700 |
| D Y R L G P N S Y D C S S A V Y F A L K E A G F I D P S T F P G N   |                                                             |                                  | 214  |
| CTGACTCCTTATTTGGTCAGTTAGAACGCGTTGGATGGT                             | CGCAAGTTCCTTTAGTAGGAGGAAAATATCATGTACAACGAGGT                | GATATTTTTATTTGGGG                | 3800 |
| T D S L F G Q L E R V G W S Q V P L V G G K Y H V Q R G D I F I W G |                                                             |                                  | 248  |
| AATCAGAGGTAACCTCTGGTGGTGAACCTGGCCACACGG                             | GAATTTTTATAGATGATAAAGATAATATTATTCATTGTACTTGTGGCT            | GGGATGGAAATAAA                   | 3900 |
| I R G N S G G E L G H T G I F I D D K D N I I H C T C G W D G N K   |                                                             |                                  | 281  |
|                                                                     |                                                             | Tn5-30                           |      |
| TGTTCAATTAATGGAATTTCTGTTGATAATCATGATCAAG                            | TATGGGTCGCTTCAGGTCGTCACCAGTTACAATTTACCGTTTTGGAGG            | TGCTTCAAAC                       | 4000 |
| C S I N G I S V D N H D Q V W V A S G R P P V T I Y R F G G A S K   |                                                             |                                  | 314  |
|                                                                     |                                                             | BamHI                            |      |
| CATATCCTGGAGATTCTTCTGGTTCAAAGGAGATTCA                               | GTAATCCTTCAGCGGGTGTATTTTATCCAAGTATGAGATTACCGGTAAGTGGT       | GATACGGA                         | 4100 |
| P Y P G D S S G S K G D S V N P S A G V F Y P S M R L P V S G D T D |                                                             |                                  | 348  |
| TCCTAATAGTCCGGCTTTAGATTACTACGAAGCTGGT                               | CAGGCTATTGTTTATGATAGTTATGTTTTTGCTAACGGCTATGCATG             | GATTAGTTACGTTGCA                 | 4200 |
| P N S P A L D Y Y E A G Q A I V Y D S Y V F A N G Y A W I S Y V A   |                                                             |                                  | 381  |

# Fig. S1-3

|                                                                                                         |        |
|---------------------------------------------------------------------------------------------------------|--------|
| GGTTCAGGATTGCGCCGTTATGTGGCAGTAGGACCAGATGATGGCCGAACAGACACTGTATGGGGAACAGGATTTTAAATAATACCCCTTCAGGATCGG     | 4300   |
| G S G L R R Y V A V G P D D G R T D T V W G T G F L N N T P S G S                                       | 414    |
| GTTCAAATACGGGAAGTGCATTGAGTGGTGTATTTTATCCTAGCATGAGATTACCGGTAAGTGGTGATACAGATCCAAATAGCCCAGCATTAGCTTATTA    | 4400   |
| G S N T G S A L S G V F Y P S M R L P V S G D T D P N S P A L A Y Y                                     | 448    |
| TGAAGCTGGTCAGGCCATTATCTACGATAGTTATGTTTTGCCAATGGTTATGCATGGATTAGTTATATTGCAGGTTTCAGGATTGCGCCGTTATGTGGCA    | 4500   |
| E A G Q A I I Y D S Y V F A N G Y A W I S Y I A G S G L R R Y V A                                       | 481    |
| Tn5-54,106,193                                                                                          |        |
| GTAGGACCAGATGATGGTCGAACAGACACTGTATGGGGAACAGGATTTTGTATAATGGTGGAGATCCTGGTTCACAGGCACACCCTAATTCTATTGGGT     | 4600   |
| V G P D D G R T D T V W G T G F F D N G G D P G S Q A H P N S I G                                       | 514    |
| Tn5-105                                                                                                 |        |
| Tn5-32                                                                                                  |        |
| KpnI                                                                                                    |        |
| TGGTACCTAAAGCAGGTAATTTGTTCCAAATCGCAAGCTTCCGGTCAGTGTGACACCGATCCAAATAGTGTGCATTAGATTATTACGAAAGCAGGTCA      | 4700   |
| L V P K A G N F V P N R K L P V S A D T D P N S A A L D Y Y E A G Q                                     | 548    |
| Tn5-25                                                                                                  |        |
| GTC AATTGGCTATGACAGTTATATTTTCGCAAATGGCTATGCATGGATTAGTTATATTGCAGGTTTCAGGATTGCGCCGTTACGTGGCAGTGGGACCAGAT  | 4800   |
| S I G Y D S Y I F A N G Y A W I S Y I A G S G L R R Y V A V G P D                                       | 581    |
| GATGGTCGTACAGACACTGTATGGGGCAAAGGATTTCTTTAATTAGTACAAATTATATTGCTTTAAACACTAGTTATTAGTGTTTAAAGCAATATTTCTTA   | 4900   |
| D G R T D T V W G K G F F N *                                                                           | 595    |
| -35                                                                                                     |        |
| -10                                                                                                     |        |
| AGATAAAGCATTAAGATCATTGAAAACATAACACCTATATGAAATCCATTACTAACGTAATTTTTATGTCACAAAATGGATATTTTCATTACAT          | 5000   |
| S.D.                                                                                                    |        |
| ORF8 ( <i>bacL2</i> ) →                                                                                 |        |
| S.D.                                                                                                    |        |
| ACATTTATAAAAAATAGAAGGTAGTGTGATTATGTGGAGTTTTGGGCAGAAGTAACTCGGTTATCAGATATCTATAGGTTTACAAATAAGGAAGAAGACTTGA | 5100   |
| V E F W A E V T R L S D I Y R F T N K E E D (L)                                                         | 23     |
| Tn5-107                                                                                                 |        |
| HindIII                                                                                                 |        |
| TAAATGTAATGGAGTATATGAAAGATATATAGGTGTATCTGCAAAAATGCAAGCATAGAAGTGAAGTCTATAAGCTTTGTATCCCGTATGAAGATTT       | 5200   |
| I N V M E Y M E R Y I G V S A K N A K H R S E L Y K L C I P Y E D F                                     | 57     |
| TATAAGTCTTTTGGATTGCGCGTATGGGAAGCGCTTGAACATATGCAGGACAAGAAAAGTAGAACATACTTTAAAAATATTGTTCTTTTGTAGAAATG      | 5300   |
| I S S F D L A V W E A L E T Y A G Q E K V E H T F K N I V L F R M                                       | 90     |
| AATCTTGCTGAAAAAGTGTGTGGCGATTATACAAAAGCAATACATGTGATAGCGCTGACAAGAAATGGTATTTCTTATGACTCTGCACGTTGGAACGAGT    | 5400   |
| N L A E K S V W R L Y K S N T C D S A D K N G I S Y D S A R W N E                                       | 123    |
| TAGATAGTAATACGTGTCAACAAAAAGATGCAGGAATAGATATAGAAGAAGCAATTTGCTATAAAGAGATGCTAAAAAACTATATAAAAAAATTTCTTAA    | 5500   |
| L D S N T C Q Q K D A G I D I E E A I C Y K E M L K N Y I K K F P K                                     | 157    |
| Tn5-188                                                                                                 |        |
| HindIII                                                                                                 |        |
| ACAAAGCAAATTTATCCTTTTGTGTTACAAGGATATACGTCATGTGAAGCTTCAAAGCTATGCCAATGGGGTTCCAACACTACGATGAAAAGAGTAGAAAG   | 5600   |
| Q S K F I L L L L Q G Y T S C E A S K L C Q W G S N Y D E K S R K                                       | 190    |
| S.D.                                                                                                    |        |
| ORF9 →                                                                                                  |        |
| AGAGCACAAAGAACGAAACAACATTTTAAAAAGTTTCTAAATGAAATGCTGTGTGAATCTTTATAAACATACAGATAAGGAGAGTTCTATGGATAAGATA    | 5700   |
| R A Q R T K Q H F K K F L N E M L C E S L *                                                             | 211/4  |
| M D K I                                                                                                 |        |
| CAAGAAGTATTATTCATATGGGACTAGAAAGTAACCATATGTTTATTCTAGCAATGATTTGCTGCGCAATGATTATTGATTTCTTATCAGGAGTTTTTG     | 5800   |
| Q E L I I H M G L E S N H M F I L A M I C C A M I I D F L S G V F                                       | 37     |
| B9P5773R 3'-CGTTACTAAACGACGCGTTACTtaagcg-5'                                                             |        |
| CCGCAAAAATGAATCCAAAAATAGACTTTCAATCAAGAATAGGAATCAATGGAATTTTAAAGAAAATAGCTGCACTAATGTTACTCATATTCTTTATCCC    | 5900   |
| A A K M N P K I D F Q S R I G I N G I L K K I A A L M L L I F F I P                                     | 71     |
| GTTAGCAATGACTATTCCAGGAAATACAGGTACAGGATTACTCTATGTACTCTACTTTGGATATTTATTAATGGAAATTCATCAATATTAGAAAAATTAT    | 6000   |
| L A M T I P G N T G T G L L Y V L Y F G Y L L M E I Q S I L E N Y                                       | 104    |
| CAAAAAATAGGAATCGATGTTTCATTGTTTTCAGAATTTTCATAAACAGATACAGTAAAAGTACGATGGATAACAATAAAAACAAATAATTCAAATGAAAAAG | 6100   |
| Q K I G I D V S L F Q N F I N R Y S K S T M D N N K T N N S N E K                                       | 137    |
| S.D.                                                                                                    |        |
| ORF10 →                                                                                                 |        |
| B9P6180F 5'-aacgctcgACAGGAATTGAGACATACGCT-3'                                                            |        |
| AAAAGAAAGAGGAGAAATAATATGAAAAAAGTCTATTTATTTAGGAACAATTTGTTAACAACAATTGCAGTACAAACAGGAATTGAGACATACGCT        | 6200   |
| E K K E E K * M K K S L F I L G T I L L T T I A V Q T G I E T Y A                                       | 143/26 |
| -35                                                                                                     |        |
| AGCAATAATTCCTTTAATCAGGAACAGATTGAATCAAAGACTAGTAAGCCAAAAACACAATATTCAGAATTAGAATTTGATACGCACGAAGAAGCAAAAAG   | 6300   |
| S N N S F N Q E Q I E S K T S K P K T Q Y S E L E F D T H E E A K                                       | 59     |

# Fig. S1-4

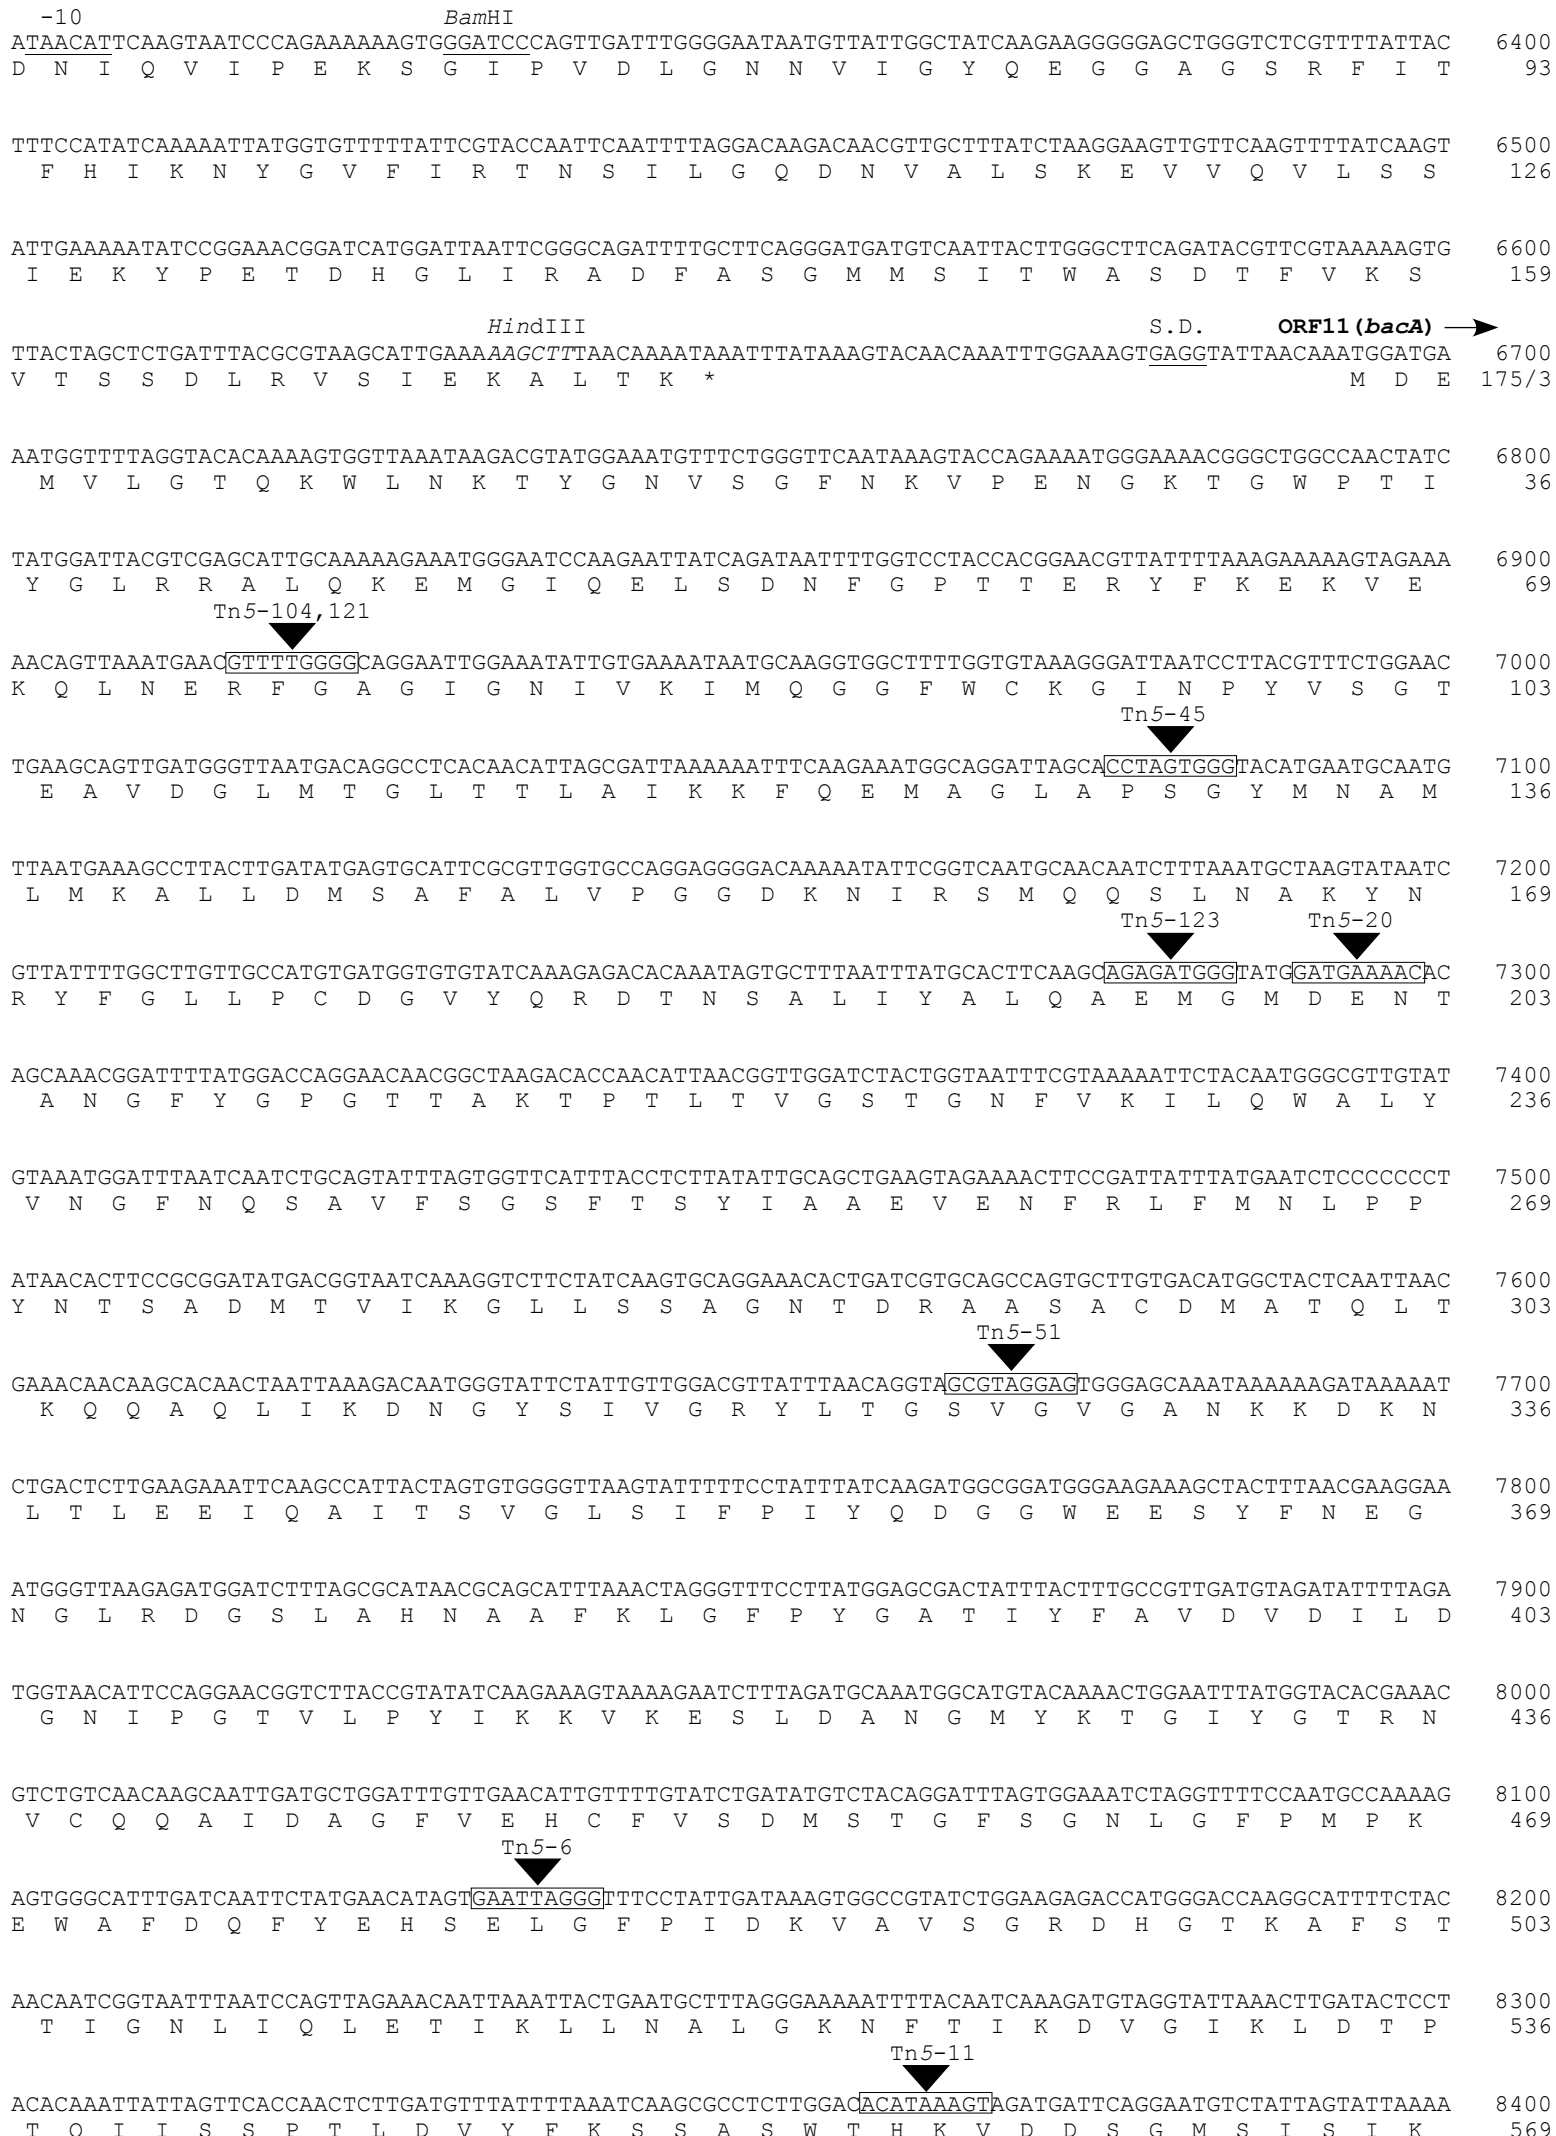

# Fig. S1-5

|                                                                                                           |             |                                                |                              |
|-----------------------------------------------------------------------------------------------------------|-------------|------------------------------------------------|------------------------------|
|                                                                                                           |             | <i>EcoRI</i>                                   |                              |
| ACGGTAAATTTGATACAAAAGTATACGTAATCCGATAAAAAGAGTCTTTGAAATTCGTATAAAGATTTACTAAAGAATTATAATGAAAATCAAGTTGATGA     | 8500        |                                                |                              |
| N G K I D T K V Y V N P I K E S L N S Y K D L L K N Y N E N Q V D E                                       | 603         |                                                |                              |
| AATGCTTAATAAGCTAGCGCCAGTTATTA AAAATGGGTATATTGAACTGGTTTTTGCGCTAGAAAATAATTTAATTTGGAACGAAATTTGGTAATTA AAAAG  |             |                                                |                              |
| M L N K L A P V I K N G Y I E T G F C A R N N L I G T K L V I K K                                         | 8600        |                                                |                              |
|                                                                                                           |             | mini-Tn7-22                                    |                              |
| GAAATCGGAGATTCTGAAAACAAAGGAAC TTACA AACTTGA AATTGAACTATTCCTAAGCCCTCTGTTACCAACTGATATTA AAAATACCTCAACCCGATT | 8700        |                                                |                              |
| E I G D S E N K G T L Q L E I E L Y P K P L L P T D I K I P Q P D                                         | 669         |                                                |                              |
| ATGATAAAGCATATAGAGATATTA AAAATGGTCATGTTCCACAATTA AATGTAGAAGTTATTCTAAAAGCGTTCTAATTTGGTGCCTAGCAGTGGTTAT     |             |                                                |                              |
| Y D K A Y R D I K N G H V P Q L N V E V I L K G V L I G A L A V V I                                       | 8800        |                                                |                              |
|                                                                                                           |             | B9P8823F 5'-ggcgggatccGCAGCAGAATTAGCAGGAGCG-3' |                              |
| TATTATTGGAATAGCTTCGGGAGCAGCAGAATTAGCAGGAGCGATAACAGCATT TTTTGTCTGCATTAGCTTAAGTTATTTCTCGTTGAAAAGAGCAACT     | 8900        |                                                |                              |
| I I G I A S G A A E L A G A I T A F F A A L A *                                                           | 726         |                                                |                              |
|                                                                                                           |             | -35                                            | -10                          |
| CTTGTGAAAGAGTTGCTTTTATAATTTGTAAAAGAAAATTTAAATGAGTATAATGAAAATAAATTTAAAGGAGGGAAATTATGAATAGTATTATAGGGGA      | 9000        | S.D.                                           | <b>ORF12 (<i>bacI</i>)</b> → |
| ▶ ←                                                                                                       |             |                                                | M N S I I G E                |
|                                                                                                           |             |                                                | B9P9015R 3'-ATCCCCT          |
| AATGGATTTGACGAAATATTTTATTCTTTTAAATTTTCCATTT TTTTACTGTATATATTTAAATTT TTTTAAATCAATCATTTGTTAGAAAGAGTAAT      | 9100        |                                                |                              |
| M D L T K Y F I L L I F P F F L L Y I F K F F L N Q S F V R K S N                                         | 40          |                                                |                              |
| TTACCTAAACTGCTTCagctgcgcaa-5'                                                                             |             |                                                |                              |
| ATTCCGAGAGAGAATTA AAAAGAACAAAAATAAATCTAATAGAGTTACAAAAGAAGAGTTTTGCATACTACAGCTTTT TTAATAATATATATTTTGT       | 9200        |                                                |                              |
| I P K R E L K E Q K I N L I E L Q K K S F A Y Y S F L I N I Y F V                                         | 73          |                                                |                              |
| TGCATTTGGTAATGGTTATTT TTTTAGGGATGTTTTTAGGATCTTTTATGAATATGGATACTTTACAAATCAATCGAACGCTATATCATATGCTTTT        | 9300        |                                                |                              |
| L H L V M V I F L G M F L G S F Y E Y G Y F T N Q S N A I S Y A F L                                       | 107         |                                                |                              |
| GACTTTGGTTACAGCTCTAATTTATTTTATTAATCAACTTACTTGTAGCAATTTTAAGAATAAAAATTTTACATACAGATCAAGGAAAACGTACGTAGAA      | 9400        |                                                |                              |
| T L V T A L I I L L I N L L V A I L R I K F L H T D Q G K L Y V E                                         | 140         |                                                |                              |
| ACACATAAAAATGTATTTTACTAAATAGTAAGCAAAAATGCTTGGTTTTCAATACACATATTTCTGTGATATTGGCAGGTTTTAATATATTTAT            | 9500        |                                                |                              |
| T H K N V F L L N S K Q K I A W F S I H I L S V I L A G F N I L L                                         | 173         |                                                |                              |
| Tn5-14,101,117                                                                                            | mini-Tn7-80 | mini-Tn7-25                                    |                              |
| TTCTTAAATTTCTACTGTTGATTAGAATTGGTAATTTTTTTGTAAAATTTGTGCATTTATAATCTTATACCCGATTTCAAAGGAGGTCAATGATGACTTTTGA   | 9600        | S.D.                                           | <b>ORF13</b> →               |
| F L N S T V Y *                                                                                           |             |                                                | M T F D                      |
|                                                                                                           |             | B9P9599R                                       | 3'-CCTCCAGTACATACTGAAAACc    |
| CTATAATTTAAAAGAAGATGAATATTTAAAAGCAATTAAGCTATATACTAGAAAATTCACTAAAACCGGTAAGCGTAAAATAAGAATTACTTATTTTGT       | 9700        |                                                |                              |
| Y N L K E D E Y L K A I K L Y T R K F T K T G K R K I R I T Y F A                                         | 37          |                                                |                              |
| ctaggccg-5'                                                                                               |             |                                                |                              |
| GGACTAGTTTTACTGGTTACTTCTGCGTATATGTTTATATCGATATTTAAACAATATCTTTCTTTCAAACAATCACTTCCTGACTACGTAGTTAGAGAAC      | 9800        |                                                |                              |
| G L V L L V T S A Y M F I S I F K Q Y L S F K Q S L P D Y V V R E                                         | 70          |                                                |                              |
| TACTTAATAAATTTTACGCAAGGTTTTGGATATATATTAATAATTATTATATATCTGTTATTTGGTATTTTTTTTCTATACAGTGCATATACTTATCC        | 9900        |                                                |                              |
| L L N K L F T Q G F G Y I L I I I I Y L L F G I F F L Y S A Y T Y P                                       | 104         |                                                |                              |
| AAGTGCTAGGATTATTAACATAAATACAGACTCGAAAAC TTAGAACCAAGAAAAGTTAATATTAATGACTTGGGAATTGTATACTGGCAAGCAATAAT       | 10000       |                                                |                              |
| S A R I I N I N T D S K T L E P R K V N I N D L G I V Y W Q A N N                                         | 137         |                                                |                              |
| GAAGCAGATAAAAATCATATTTTGGGATGACATAGAAGATGTTTTGAGAATGAAGAATTTTATTTAATGACAGTCGCCAAAAGAAAATTTTATTT           | 10100       |                                                |                              |
| E A D K K S Y F W D D I E D V F E N E E F Y L M T V A K K K I F I                                         | 170         |                                                |                              |
| TACCTAAGAGAATGATTTCTACGAAAACACAAAGTGAATTTATAGAGAAACATGTTACGAAATGAAATGTATCTCTCTATTGACAATTATTAGATGCTGG      | 10200       |                                                |                              |
| L P K R M I S T K T Q S E F I E K H V T K *                                                               | 191         |                                                |                              |
|                                                                                                           |             | -35                                            | -10                          |
| AAAATGTAATAAACA AAAATATAGAAATCAATAACAGGATTATTTATATATTTTATAAAGTTTGTATATTGTAGATTTTATTAGAGTTTAAGGAGTG        | 10300       | S.D.                                           |                              |
| ▶ ←                                                                                                       |             |                                                | Tn5-115,153                  |
| <b>ORF14</b> →                                                                                            |             |                                                |                              |
| AATAAATATGAAAAGTGTAGTATGGATTTTACAGTAAATACTGATGGAGTTGTGATTAGAAGCAGTGGTTCTGGTATGATGTGGATTAGCTCAAAAAAA       | 10400       |                                                |                              |
| M K S V V W I Y T V N T D G V V I R S S G S G M M W I S S K K                                             | 31          |                                                |                              |
| B9P10335R 3'-CACATCATACCTAAATATGTCcctaggccg-5'                                                            |             |                                                |                              |
| TTTCAAGATAAACTAAAAAGAATTACTACCAGAATGGAATCTATCCATTATTAGTTATGATATAGCTAAAATGATATACCTGATGCAGATATTATTT         | 10500       |                                                |                              |
| F Q D K L K K E L L P E W N L S I I S Y D I A K N D I P D A D I I                                         | 64          |                                                |                              |

# Fig. S1-6

TGTACAATGAGATAGATATGGCATATCTTGATGAAAAAATCAAGAATACTGGATTGCCTGTATCATATATAGATTTACAAACAAAAAATGCTGATAGTAT 10600  
L Y N E I D M A Y L D E K I K N T G L P V S Y I D L Q T K N A D S I 98  
Tn5-38,39,163

AAAGAAAAAATTAGAAAAATTTGCTGAAAATAAAATATAATAAATACTACTATAAAGTTACTGATGAAAAAGACCAACAGGGTATGCCTTGTTGGTTCTT 10700  
K K K L E K F A E N K I \* 110

TTACATATTTCCAATTTTTACCAGGTATATAGTAGGACACCCAAGTTGGGCATACTTAATTTGTGTGAACTTTGAGTATACTTAAAATCTTATTGTTGAAG 10800

-35 -10  
TTCTTGTTGAATAGTGATTACCCTGTAAAATATAAATTGTAATAGTTAGTAATATTAAAACATCGTAAGTCGAATGTTTGTATTTTTACAATTGTGGAGAT 10900

GATGGTGAGTCGCCACATTATACTCATTTACAAAGTTTGGCAGCAATTATTAGTAATCTATCTTATTTTTTCAATTAAAACTTTTCTAGTTAATAAAATT 11000

mini-Tn7-87 mini-Tn7-74 mini-Tn7-76 S.D. **ORF15** →  
TATGAATAGATTGCGCGAAAACTTATGAATATACAAAAAATTAAAATAGTTAATGATAACACGAAAAAAGGAGAAAATATGAAAATAATTGATTCATTA 11100  
M K I I D S L 7

mini-Tn7-69 mini-Tn7-59  
TCACTTGATGCATTGATTGCGGTTTCTGCAGCAATGTTGACATTACTAATACCAGTTGCAATATTTCTAATAGAAGGGACAAGCAATGACAACGAAGACT 11200  
S L D A L I A V S A A M L T L L I P V A I F L I E G T S N D N E D 40

CTTTCGCTTGGAATAGAATGGTTATTTTTTCTCAAATTATAAAACCAAAGTCAACATATTTTTCTATGATATTGATTACGGTTCCTTTGATATTTTGGAA 11300  
S F A W N R M V I F S Q I I K P K S T Y F S M I L I T V P L I F W N 74

mini-Tn7-70 mini-Tn7-40 mini-Tn7-80  
CAGTAGTAATACACTTTGCAAAATATTATCTTGTACTTATTGTATTAGGAAATGTAATCATGTTTCAATTTTAAAATCTTCCTATTTCTGGAATTATT 11400  
S S N T L C K I I I L L L I V L G N V I M F S I L K S S Y F W I I 107

TCCAAAAATCAAAAAAATAAAAAATTTAGGGAACGCGTAAGATTAAAATTTTTAAACGAGTTAAGTAAAAATAAGAAATGAGTACCAAATCCAAAGTTG 11500  
S K N Q K N K N F R E R V R L K F L N E L S E N K E M S T K S K V 140

mini-Tn7-83  
AAACATGGCAAAACAATATGGAATCAAAAAAAGTAGATATGGATAGTTGTGAACTAATAGAAGCTTTCAAAAACCTTCTATACCTCTGTAAGACGATGA 11600  
E T W Q T I W K S K K V D M D S C E L I E A F K N F Y T S V K D D D 174

TAAATATCAACTTTTACATGTTTTCTCAGAAAATTTAAAATTTGATTTGAAAATAAAGACAAAGTACAAGAATTTGTATATTTTCAAATTAATCAATAT 11700  
K Y Q L L H V F S E N L K I D F E N K D K V Q E F V Y F Q I N Q Y 207

*Bgl*III  
AACCATGTTGAAAATAAAATGAAATACGCTATAAAAGATCTATTTTTAAATTATATGATTTGTCAAATTAAGTTAGAATAAAATGCTTCTTGTACATAGC 11800  
N H V E N K M K Y A I K D L F L N Y M I C Q I K L E \* 233

TCAAAAATATCTCAATTGGTGTCTGTAATTCATGATTTTCTTGAATATGATTACGTTGATTGCTGACACTGGAAAATAAATGTCTGATTCACCTTCTCT 11900

*Eco*RI  
AAAATCCATTGATTTCCGCAGTCCATTACGACGCAGAATCCCGTTAGAAATTC 11952
